# Supplementary material for: Nanoporous Activated Carbon Material from Terminalia chebula Seed for Supercapacitor Application
Source: MDPI journal article supplement (doi:10.3390/c9040109), 2023-11-14
Supplement: s1 [file s1]

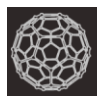

## Electronic Supporting Information

# Nanoporous Activated Carbon Material from *Terminalia chebula* Seed for Supercapacitor Application

Chhabi Lal Gnawali <sup>1</sup>, Lok Kumar Shrestha <sup>2,3,\*</sup>, Jonathan P. Hill <sup>2</sup>, Renzhi Ma <sup>2</sup>, Katsuhiko Ariga <sup>2,4</sup>, Mandira Pradhananga Adhikari <sup>5</sup>, Rinita Rajbhandari <sup>1</sup> and Bhadra P. Pokharel <sup>1</sup>

<sup>1</sup> Department of Applied Sciences and Chemical Engineering, Pulchowk Campus, Institute of Engineering (IOE), Tribhuvan University, Lalitpur 44700, Nepal; chhabig123@ioe.edu.np (C.L.G.); rinita.joshi@pcampus.edu.np (R.R.); bhadrapokharel@ioe.edu.np (B.P.P.)

<sup>2</sup> Center for Materials Nanoarchitectonics (WPI-MANA), National Institute for Materials Science (NIMS), 1-1 Namiki, Tsukuba 305-0044, Ibaraki, Japan; jonathan.hill@nims.go.jp (J.P.H.); ma.renzhi@nims.go.jp (R.M.); ariga.katsuhiko@nims.go.jp (K.A.)

<sup>3</sup> Department of Materials Science, Faculty of Pure and Applied Sciences, University of Tsukuba, 1-1-1 Tennodai, Tsukuba 305-8573, Ibaraki, Japan

<sup>4</sup> Department of Advanced Materials Science, Graduate School of Frontier Sciences, The University of Tokyo, 5-1-5 Kashiwanoha, Kashiwa 277-8561, Chiba, Japan

<sup>5</sup> Central Department of Chemistry, Tribhuvan University, Kirtipur, Kathmandu 44613, Nepal; mandira43@hotmail.com

\* Correspondence: shrestha.lokkumar@nims.go.jp; Tel.: +81-29-860-4809

### 1. Additional SEM images

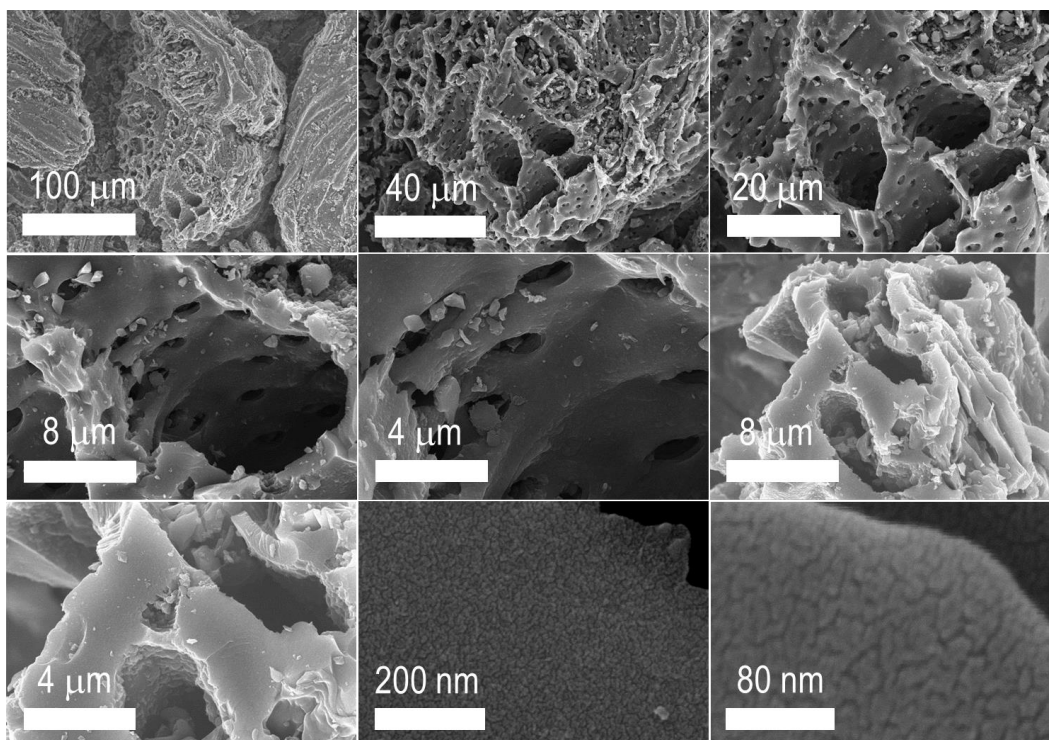

**Figure S1.** Additional SEM images of the directly carbonized reference sample, HrP\_500.

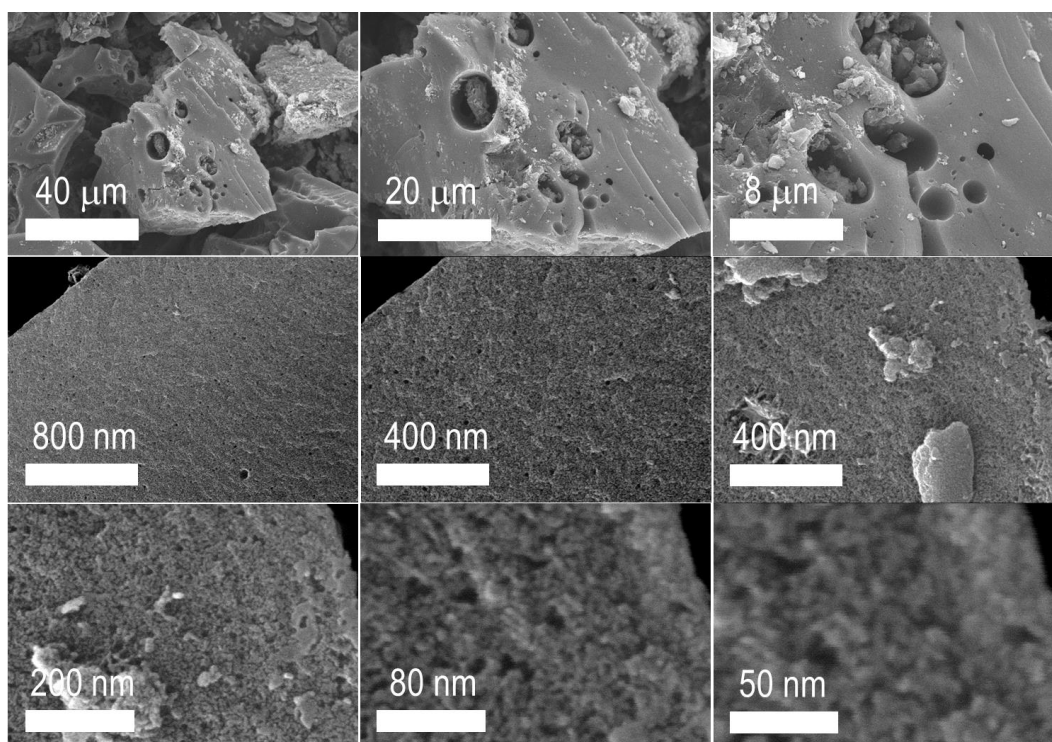

**Figure S2.** Additional SEM images of Harro carbon carbonized at 400 °C, HrC\_Z400.

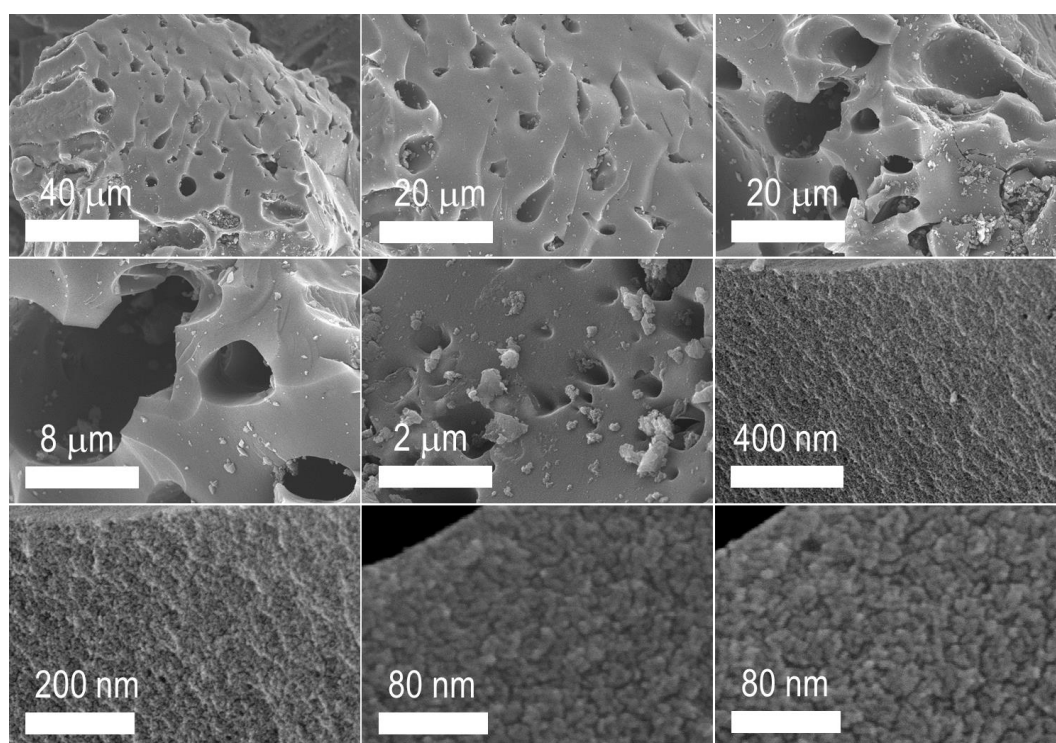

**Figure S3.** Additional SEM images of Harro carbon carbonized at 500 °C, HrC\_Z500.

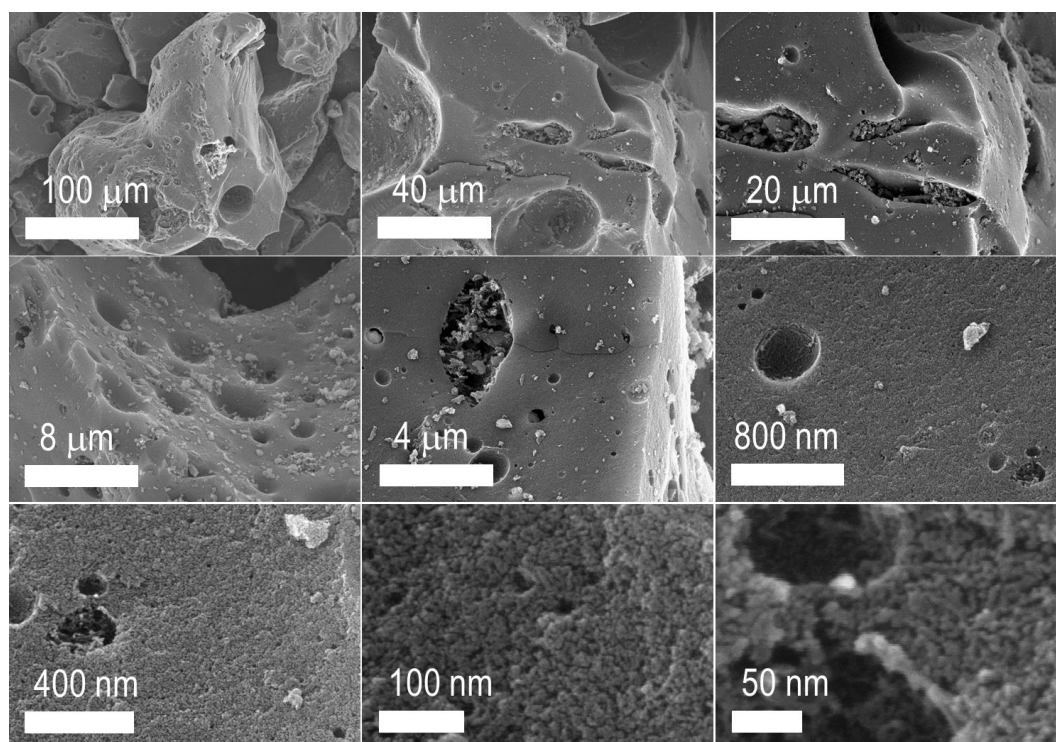

**Figure S4.** Additional SEM images of Harro carbon carbonized at 600 °C, HrC\_Z600.

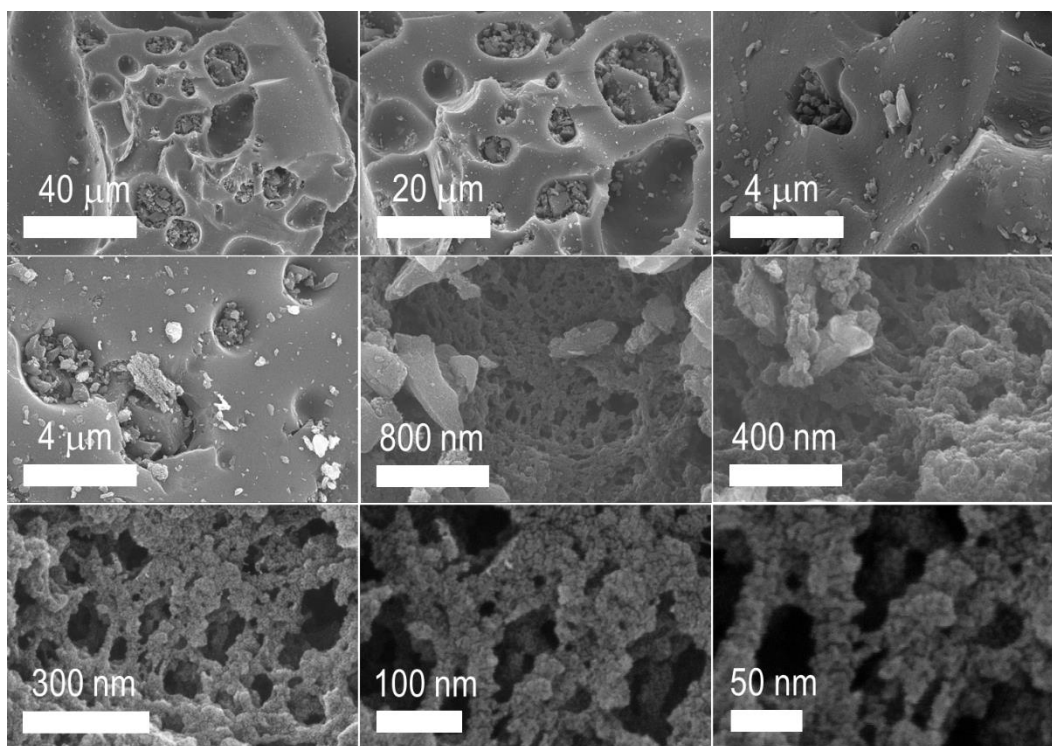

**Figure S5.** Additional SEM images of Harro carbon carbonized at 700 °C, HrC\_Z700.

## 2. Additional TEM images

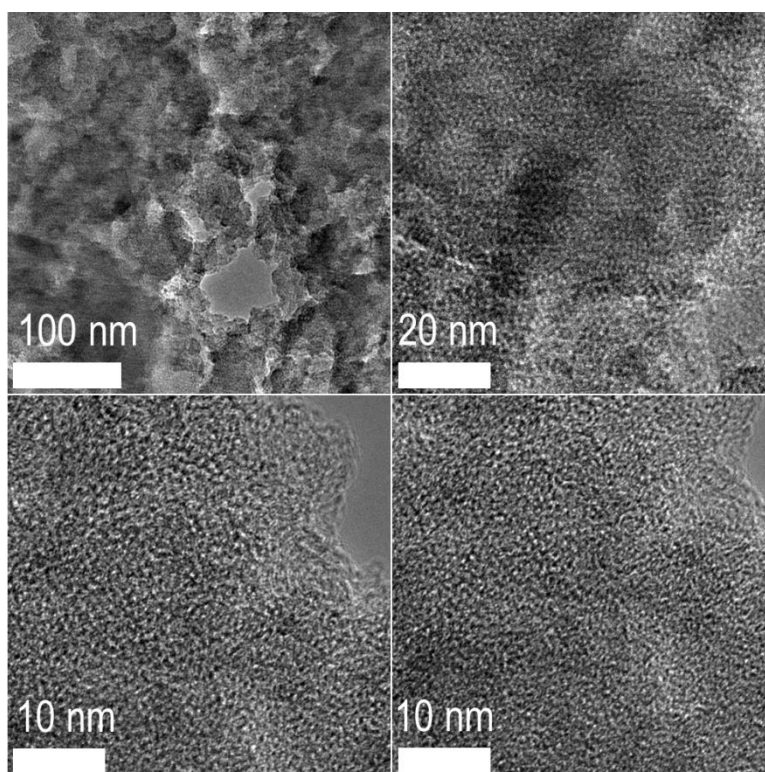

**Figure S6.** Additional TEM and HR-TEM images of the optimal sample, HrC\_Z700.

### 3. FTIR data

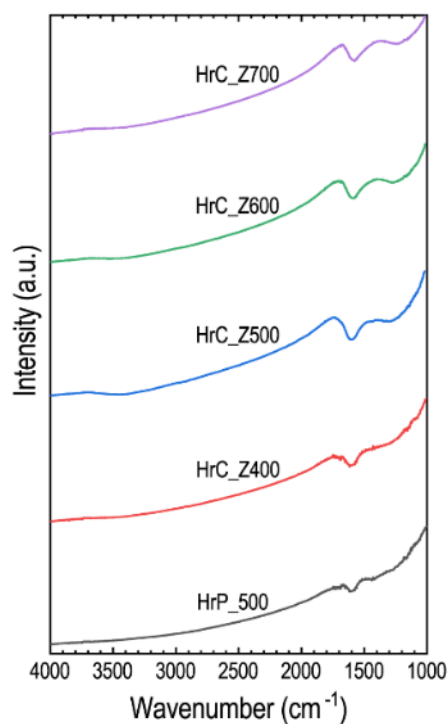

**Figure S7.** FTIR spectra of the directly carbonized reference sample, HrP\_500, and the  $\text{ZnCl}_2$  activated carbon materials.

### 4. Additional electrochemical data

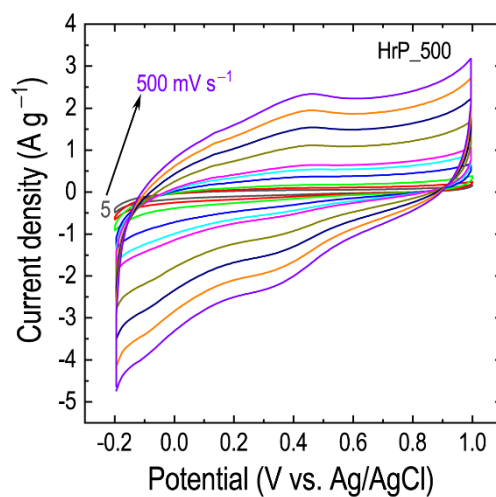

**Figure S8.** CV profiles of the directly carbonized reference sample, HrP\_500 at different scan rates from 5 to  $500 \text{ mV s}^{-1}$ .

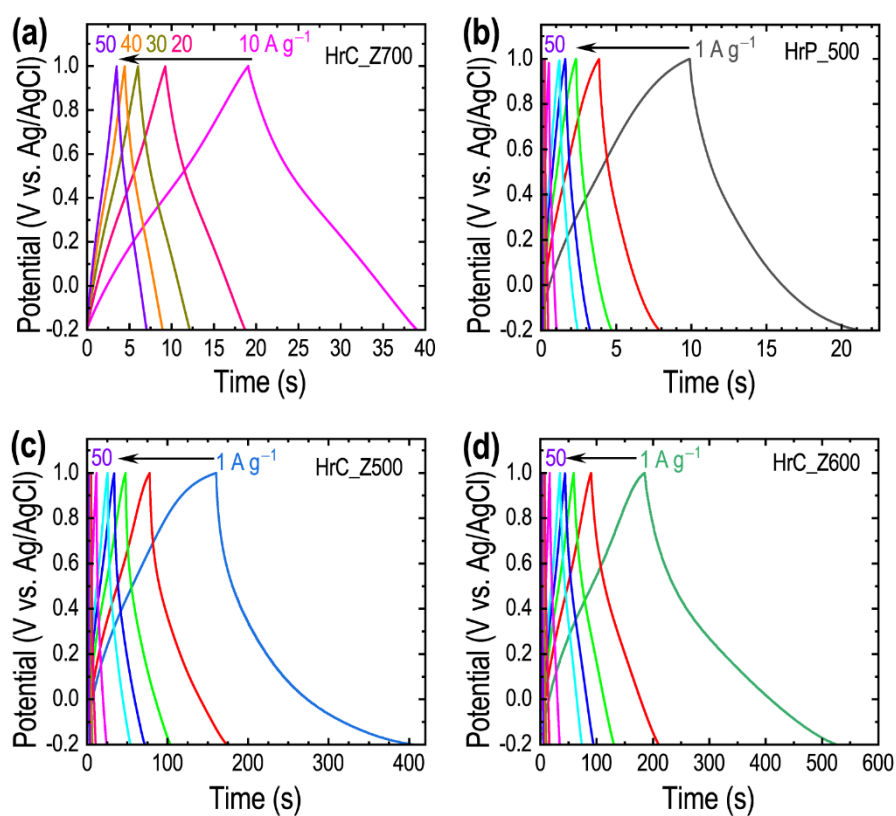

**Figure S9.** Additional GCD data. (a) GCD profiles of HrC\_Z700 at higher current densities from 10 to 50  $\text{A g}^{-1}$ , and GCD vs. current density profiles of different samples: (b) HrP\_500, (c) HrC\_Z500, (d) HrC\_Z600.



**Table S1.** Comparison of the electrochemical supercapacitance performance of Harro seed stone-derived porous carbons with other carbon materials derived from other biomass.

| Carbon precursors                                                                                             | Electrolyte                           | Current density (A g <sup>-1</sup> ) | C <sub>s</sub> (F g <sup>-1</sup> ) | Reference |
|---------------------------------------------------------------------------------------------------------------|---------------------------------------|--------------------------------------|-------------------------------------|-----------|
| Harro seed stone (ZnCl <sub>2</sub> activated)                                                                | 1 M H <sub>2</sub> SO <sub>4</sub>    | 1                                    | 328                                 | This work |
| Barro seed stone (ZnCl <sub>2</sub> activated)                                                                | 1 M H <sub>2</sub> SO <sub>4</sub>    | 1                                    | 319                                 | [12]      |
| Date seed (KOH activated)                                                                                     | 1 M H <sub>2</sub> SO <sub>4</sub>    | 1                                    | 386                                 | [14]      |
| Apple-pomace (K <sub>2</sub> FeO <sub>4</sub> activated)                                                      | 6 M KOH                               | 0.5                                  | 360                                 | [16]      |
| Tasmanian Blue Gum (KOH activated)                                                                            | 1 M KOH                               | 1                                    | 212                                 | [33]      |
| Walnut shell (KMnO <sub>4</sub> activated)                                                                    | 6 M KOH                               | 0.5                                  | 380                                 | [36]      |
| Lotus leaf (KOH activated)                                                                                    | 6 M KOH                               | 0.5                                  | 425                                 | [39]      |
| Corn husk (K <sub>2</sub> CO <sub>3</sub> activated)                                                          | 0.5 M H <sub>2</sub> SO <sub>4</sub>  | 0.25                                 | 225                                 | [65]      |
| American ginseng waste residue (KOH activated)                                                                | 6 M KOH                               | 0.1                                  | 268                                 | [66]      |
| Coconut shell (KOH activated)                                                                                 | 0.5 M Na <sub>2</sub> SO <sub>4</sub> | 1                                    | 397                                 | [67]      |
| Rotten wood (ZnCl <sub>2</sub> activated)                                                                     | 6 M KOH                               | 1                                    | 350                                 | [68]      |
| Lotus seed (ZnCl <sub>2</sub> activated)                                                                      | 1 M H <sub>2</sub> SO <sub>4</sub>    | 1                                    | 272.9                               | [69]      |
| Washnut seed (KOH activated)                                                                                  | 1 M H <sub>2</sub> SO <sub>4</sub>    | 1                                    | 288.7                               | [70]      |
| Washnut seed (ZnCl <sub>2</sub> activated)                                                                    | 1 M H <sub>2</sub> SO <sub>4</sub>    | 1                                    | 225.1                               | [71]      |
| Jackfruit seed (ZnCl <sub>2</sub> activated)                                                                  | 1 M H <sub>2</sub> SO <sub>4</sub>    | 1                                    | 261.3                               | [72]      |
| Pine Sawdust (CO <sub>2</sub> activated)                                                                      | 6 M KOH                               | 1                                    | 225                                 | [73]      |
| <i>Citrus bergamia</i> peels (H <sub>3</sub> PO <sub>4</sub> and Mn(NO <sub>3</sub> ) <sub>2</sub> activated) | 6 M KOH                               | 0.1                                  | 289                                 | [74]      |
| Prosopis juliflora wood (KOH activated)                                                                       | 6 M KOH                               | 0.5                                  | 588                                 | [75]      |
| Lapsi seed (ZnCl <sub>2</sub> activated)                                                                      | 1 M H <sub>2</sub> SO <sub>4</sub>    | 1                                    | 284.0                               | [76]      |
| Corn cob (KOH activated)                                                                                      | 6 M KOH                               | 0.5                                  | 382                                 | [77]      |
| Cotton fiber (NaOH activated)                                                                                 | 3 M KOH                               | 0.3                                  | 222                                 | [78]      |
| Cottonseed hull (KOH activated)                                                                               | 6 M KOH                               | 0.5                                  | 304                                 | [79]      |
| Bio-decomposed product (K <sub>2</sub> CO <sub>3</sub> activated)                                             | 6 M KOH                               | 0.05                                 | 209                                 | [80]      |
| Lignocellulose carbon                                                                                         | 1 M NaCl                              | 1                                    | 172.9                               | [81]      |
| Biomass-derived lignin                                                                                        | 6 M KOH                               | 0.5                                  | 348                                 | [82]      |
| Kraft lignin (CO <sub>2</sub> activated)                                                                      | 6 M KOH                               | 0.1                                  | 155                                 | [83]      |
| salvia splendens (NaCl activated)                                                                             | 6 M KOH                               | 1                                    | 294                                 | [84]      |
| Yeast (Na <sub>2</sub> SiO <sub>3</sub> activated)                                                            | 6 M KOH                               | 0.5                                  | 313                                 | [85]      |
| Wood sawdust (KOH activated)                                                                                  | 6 M KOH                               | 0.5                                  | 225                                 | [86]      |
| Wood                                                                                                          | 1 M H <sub>2</sub> SO <sub>4</sub>    | 0.5                                  | 260                                 | [87]      |
| Houttuynia biomass (KOH activated)                                                                            | 6 M KOH                               | 1                                    | 473.5                               | [88]      |

## References

12. Gnawali, C. L.; Manandhar, S.; Shahi, S.; Shrestha, R. G.; Adhikari, M. P.; Rajbhandari, R.; Pokharel, B. P.; Ma, R.; Ariga, K.; Shrestha, L. K. Nanoporous Carbon Materials from Terminalia bellirica Seed for Methylene Blue Adsorption and High-Performance Supercapacitor Applications. *Bull. Chem. Soc. Jpn.* **2023**, *96*, 572–581.
14. Shrestha, R. G.; Maji, S.; Mallick, A. K.; Jha, A.; Shrestha, R. M.; Rajbhandari, R.; Hill, J. P.; Ariga, K.; Shrestha, L. K. Hierarchically Porous Carbon Materials from Phoenix Dactylifera Seed for High-Performance Supercapacitor Applications. *Bull. Chem. Soc. Jpn.* **2022**, *95*, 1060–1067.
16. Zhang, S.; Li, Y.; Du, Y.; Ma, X.; Lin, J.; Chen, S. Apple-Pomace-Based Porous Biochar as Electrode Materials for Supercapacitors. *Diamond Relat. Mater.* **2022**, *130*, 109507.
33. Prasankumar, T.; Salpekar, D.; Bhattacharya, S.; Manoharan, K.; Yadav, R. M.; Mata, M. A. C.; Miller, K. A.; Vajtai, R.; Jose, S.; Roy, S.; Ajayan, P. M. Biomass Derived Hierarchical Porous Carbon for Supercapacitor Application and Dilute Stream CO<sub>2</sub> Capture. *Carbon* **2022**, *199*, 249–257.
36. Zhang, G.; Bai, Q.; Wang, X.; Li, C.; Uyama, H.; Shen, Y. Preparation and Mechanism Investigation of Walnut Shell-Based Hierarchical Porous Carbon for Supercapacitors. *Bull. Chem. Soc. Jpn.* **2023**, *96*, 190–197.
39. Liu, H.; Chen, W.; Zhang, R.; Ren, Y. Naturally O-N-S Co-Doped Carbon with Multiscale Pore Architecture Derived from Lotus Leaf Stem for High-Performance Supercapacitors. *Bull. Chem. Soc. Jpn.* **2021**, *94*, 1705–1714.
65. Lobato-peralta, D. R.; Duque-Brito, E.; Orugba, H.O.; Arias, D. M.; Cuentas-Gallegos, A. K.; Okolie, J. A.; Okoye, P. U. Sponge-like Nanoporous Activated Carbon from Corn Husk as a Sustainable and Highly Stable Supercapacitor Electrode for Energy Storage. *Diamond Relat. Mater.* **2023**, *138*, 110176.
66. Tu, J.; Qiao, Z.; Wang, Y.; Li, G.; Zhang, X.; Li, G.; Ruan, D. American Ginseng Biowaste-Derived Activated Carbon for High-Performance Supercapacitors. *Intl. J. Electrochem. Sci.* **2023**, *18*, 16–24.
67. Wang, J.; Zhang, Q.; Deng, M. Eco-Friendly Preparation of Biomass-Derived Porous Carbon and its Electrochemical Properties. *ACS Omega* **2022**, *7*, 22689–22697.
68. Wang, J.; Yang, H.; Feng, Y.; Gao, X.; Zhou, C.; Cong, S.; Ke, S. High-performance Supercapacitor Electrodes from Porous Rotten Wood Cellulose-derived Carbon via Fungi Action. *Chem. Lett.* **2023**, *52*, 389–392.
69. Shrestha, R. L.; Chaudhary, R.; Shrestha, T.; Tamrakar, B. M.; Shrestha, R. G.; Maji, S.; Hill, J. P.; Ariga, K.; Shrestha, L. K. Nanoarchitectonics of Lotus Seed Derived Nanoporous Carbon Materials for Supercapacitor Applications. *Materials* **2020**, *13*, 5434.
70. Shrestha, R. L.; Chaudhary, R.; Shrestha, R. G.; Shrestha, T.; Maji, S.; Ariga, K.; Shrestha, L. K. Washnut Seed-Derived Ultra-high Surface Area Nanoporous Carbons as High Rate Performance Electrode Material for Supercapacitors. *Bull. Chem. Soc. Jpn.* **2021**, *94*, 565–572.
71. Shrestha, R. L.; Shrestha, T.; Tamrakar, B. M.; Shrestha, R. G.; Maji, S.; Ariga, K.; Shrestha, L. K. Nanoporous Carbon Materials Derived from Washnut Seed with Enhanced Supercapacitance. *Materials* **2020**, *13*, 2371.
72. Chaudhary, R.; Maji, S.; Shrestha, R. G.; Shrestha, R. L.; Shrestha, T.; Ariga, K.; Shrestha, L. K. Jackfruit Seed-Derived Nanoporous Carbons as the Electrode Material for Supercapacitors. *C J. Carbon Res.* **2020**, *6*, 73.
73. Gao, F.; Zhang, J.; Ren, M.; Ge, Y.; Chen, H.; Ma, X.; Hao, Q. Preparation and Characterization of Porous Carbons by Pyrolysis-CO<sub>2</sub> Gasification of Pine Sawdust. *Chem. Lett.* **2020**, *49*, 652–655.
74. Gehrke, V.; Maron, G. K.; Rodrigues, L. D. S.; Alano, J. H.; Pereira, C. M. P. D.; Orlandi, M. O.; Carreño, N. L.V. Facile Preparation of a Novel Biomass-Derived H<sub>3</sub>PO<sub>4</sub> and Mn(NO<sub>3</sub>)<sub>2</sub> Activated Carbon from Citrus Bergamia Peels for High-Performance Supercapacitors. *Mater. Today comm.* **2021**, *26*, 101779.
75. Selvaraj, A. R.; Muthusamy, A.; Cho, I.; Kim, H.-J.; Senthil, K.; Prabakar, K. Ultrahigh Surface Area Biomass Derived 3D Hierarchical Porous Carbon Nanosheet Electrodes for High Energy density Supercapacitors. *Carbon* **2021**, *174*, 463.
76. Shrestha, L. K.; Shrestha, R. G.; Maji, S.; Pokharel, B. P.; Rajbhandari, R.; Shrestha, R. L.; Pradhananga, R. R.; Hill, J. P.; Ariga, K. High Surface Area Nanoporous Graphitic Carbon Materials Derived from Lapsi Seed with Enhanced Supercapacitance. *Nanomaterials* **2020**, *10*, 728.
77. Song, Y.; Qu, W.; He, Y.; Yang, H.; Du, M.; Wang, A.; Yang, Q.; Chen, Y. Q. Synthesis and Processing Optimization of N-doped Hierarchical Porous Carbon Derived from Corn cob for High Performance Supercapacitors. *J. Energy Storage* **2020**, *32*, 101877.
78. Liu, Y.; Shi, Z.; Gao, Y.; An, W.; Cao, Z.; Liu, J. Biomass-Swelling Assisted Synthesis of Hierarchical Porous Carbon Fibers for Supercapacitor Electrodes. *ACS Appl. Mater. Interfaces* **2016**, *8*, 28283–28290.
79. Jiang, Y.; Zhang, Z.; Zhang, Y.; Zhou, X.; Wang, L.; Yasin, A.; Zhang, L. Bioresource Derived Porous Carbon from Cottonseed Husk for Removal of Triclosan and Electrochemical Application. *RSC Adv.* **2018**, *8*, 42405–42414.
80. Zhu, Y.; Chen, M.; Zhang, Y.; Zhao, W.; Wang, C. A Biomass-Derived Nitrogen-doped Porous Carbon for High-Energy Supercapacitor. *Carbon* **2018**, *140*, 404–412.
81. Lu, T.; Xu, X.; Zhang, S.; Pan, L.; Wang, Y.; Alshehri, S. M.; Ahamad, T.; Kim, M.; Na, J.; Hossain, Md. S. A.; Shapter, J. G.; Yamauchi, Y. High-Performance Capacitive Deionization by Lignocellulose-Derived Eco-Friendly Porous Carbon Materials. *Bull. Chem. Soc. Jpn.* **2020**, *93*, 1014–1019.



- 
82. Cao, M.; Wang, Q.; Cheng, W.; Huan, S.; Hu, Y.; Niu, Z.; Han, G.; Cheng, H.; Wang, G. A Novel Strategy Combining Electro-spraying and One-Step Carbonization for the Preparation of Ultralight Honeycomb-Like Multilayered Carbon from Biomass-Derived Lignin. *Carbon* **2021**, *179*, 68–79.
  83. Schlee, P.; Hosseinaei, O.; Baker, D.; Landmér, A.; Tomani, P.; Mostazo-López, M. J.; Cazorla-Amorós, D.; Herou, S.; Titirici, M.-M. From Waste to Wealth: From Kraft Lignin to Free-Standing Supercapacitors. *Carbon* **2019**, *145*, 470–480.
  84. Liu, B.; Yang, M.; Chen, H.; Liu, Y.; Yang, D.; Li, H. Graphene-Like Porous Carbon Nanosheets Derived from *Salvia splendens* for High-Rate Performance Supercapacitors. *J. Power Sources* **2018**, *397*, 1–10.
  85. Tian, Y.; Ren, Q.; Chen, X.; Li, L.; Lan, X. Yeast-Based Porous Carbon with Superior Electrochemical Properties, *ACS Omega* **2022**, *7*, 654–660.
  86. Huang, Y.; Peng, L.; Liu, Y.; Zhao, G.; Chen, J. Y.; Yu, G. Biobased Nano Porous Active Carbon Fibers for High-Performance Supercapacitors. *ACS Appl. Mater. Interface* **2016**, *8*, 15205–15215.
  87. Chen, Z.; Zhou, H.; Hu, Y.; Lai, H.; Liu, L.; Zhong, L.; Peng, X. Wood-Derived Lightweight and Elastic Carbon Aerogel for Pressure Sensing and Energy Storage. *Adv. Funct. Mater.* **2020**, *30*, 1910292.
  88. Shang, Z.; An, X.; Zhang, H.; Shen, M.; Baker, F.; Liu, Y.; Liu, L.; Yang, J.; Cao, H.; Xu, Q.; Liu, H.; Ni, Y. Houttuynia-Derived Nitrogen-Doped Hierarchically Porous Carbon for High-Performance Supercapacitor. *Carbon* **2020**, *161*, 62–70.

**Disclaimer/Publisher’s Note:** The statements, opinions and data contained in all publications are solely those of the individual author(s) and contributor(s) and not of MDPI and/or the editor(s). MDPI and/or the editor(s) disclaim responsibility for any injury to people or property resulting from any ideas, methods, instructions or products referred to in the content.
